# Supplementary material for: A metal–organic framework containing discrete single-walled nanotubes based on curved trinuclear [Cu3(μ3-O)(μ-OH)(triazolate)2]+ building blocks
Source: Royal Society of Chemistry journal article supplement (doi:10.1039/b808240e), 2008-01-01
Supplement: b808240e.pdf [file b808240e.pdf]

## Supplementary information

**A metal-organic framework containing discrete single-walled nanotubes based on curved trinuclear  $[\text{Cu}_3(\mu_3\text{-O})(\mu\text{-OH})(\text{triazolate})_2]^+$  building blocks**

Xiao-Chun Huang,\* Wei Luo, Yu-Feng Shen, Xin-Jian Lin and Dan Li\*

---

Department of Chemistry

Shantou University

Guangdong 515063, People's Republic of China

Fax: +86 754 2902767

Tel: +86 754 2902917

Email: xchuang@stu.edu.cn, dli@stu.edu.cn

[\*\*] This work was supported by the Natural Science Foundation of Guangdong Province of China (No. 06027203) and the National Natural Science Foundation of China (No. 20771072).

---

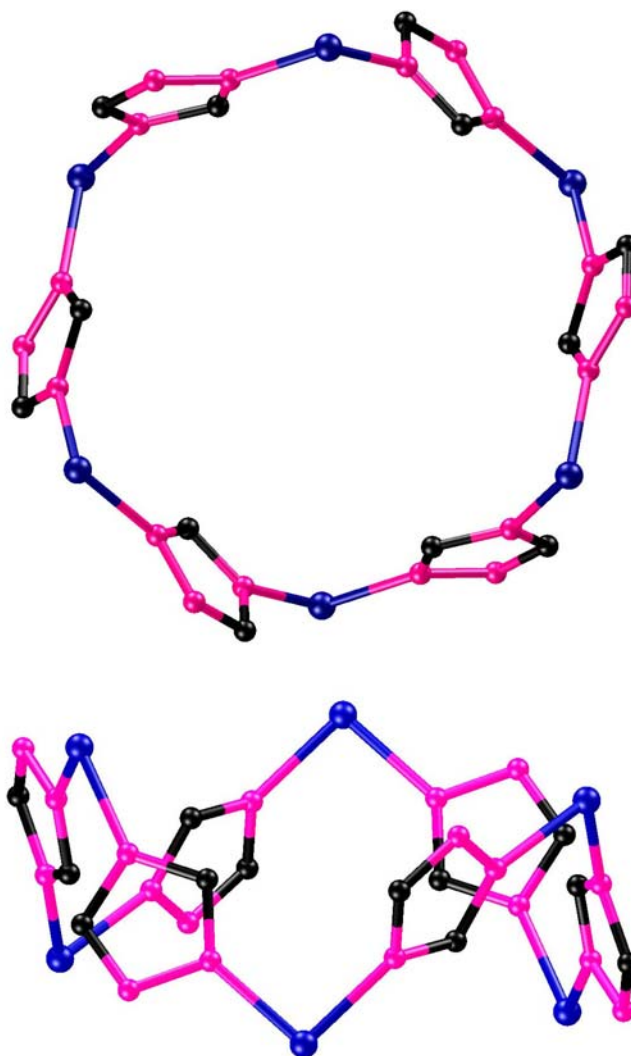

Fig. S1. Perspective view of hexanuclear crown-like metallamacrocycles  $[\text{Cu}_6(\text{tz})_6]$  in **1**, up:  
top view; down: side view.

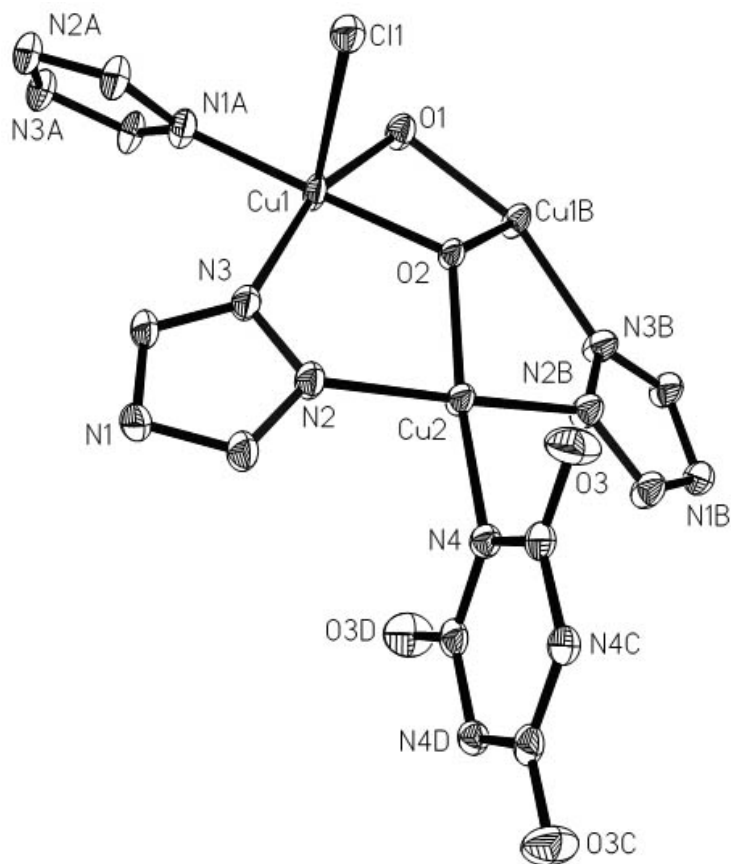

Fig. S2. ORTEP plot (50% probability ellipsoids) of the coordination environments of copper atoms in **1**. Selected bond length ( $\text{\AA}$ ) and bond angles ( $^\circ$ ): Cu1-N1A 1.984(3); Cu1-Cl1 2.6778(5); Cu2-N4 1.987(4); O1-Cu1-O2 80.23(9); O1-Cu1-N1A 99.03(11); O2-Cu1-N1A 178.91(11); O1-Cu1-N3 161.04(11); O2-Cu1-N3 87.11(10); N1A-Cu1-N3 93.80(11); O1-Cu1-Cl1 96.08(10); O2-Cu1-Cl1 88.28(9); N1A-Cu1-Cl1 91.01(8); N3-Cu1-Cl1 97.60(8); O2-Cu2-N2 86.79(8); N2-Cu2-N2B 165.9(2); O2-Cu2-N4 167.60(14); N2-Cu2-N4 94.48(8), symmetry code: A)  $y, -x+y, -z$ ; B)  $x, y, 1/2-z$ ; C)  $-y, x-y+1, z$ ; D)  $-x+y-1, -x, -z+1/2$ .

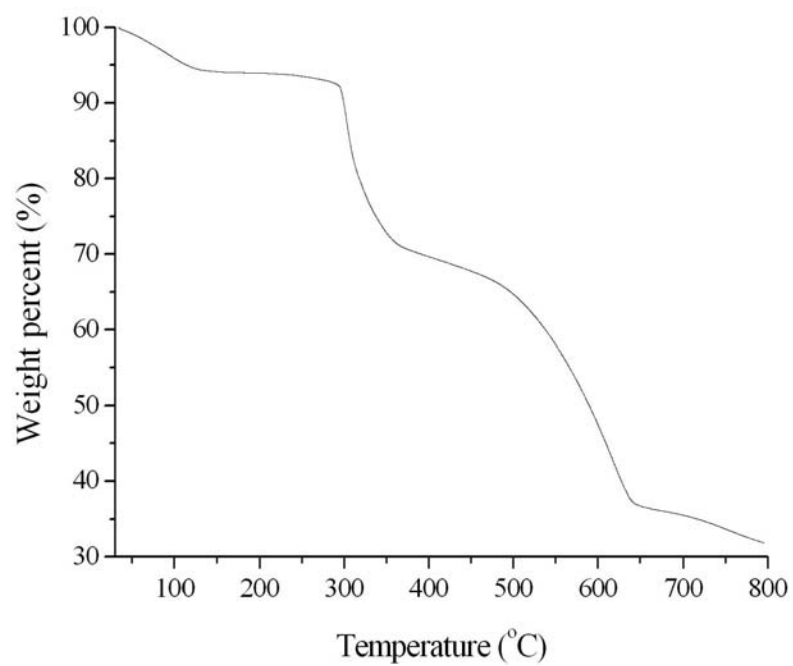

Fig. S3. TG curve for **1**.
